# Supplementary material for: Efficacy and safety of long-term therapy for high-grade glioma with temozolomide: A meta-analysis
Source: PubMed Central journal article supplement (PMC5584285; doi:10.18632/oncotarget.17401), 2017-04-24
Supplement: oncotarget-08-51758-s001.pdf [file oncotarget-08-51758-s001.pdf]

## **Efficacy and safety of long-term therapy for high-grade glioma with temozolomide: A meta-analysis**

### **SUPPLEMENTARY MATERIALS**

#### **Supplementary Table 1: PRISMA checklist**

See Supplementary File 1
